# Supplementary material for: Multi-layered mesoporous TiO2thin films with large pores and highly crystalline frameworks for efficient photoelectrochemical conversion
Source: Royal Society of Chemistry journal article supplement (doi:10.1039/c2ta00588c), 2012-11-16
Supplement: c2ta00588c.pdf [file c2ta00588c.pdf]

## Supporting Information

### Multi-layered Mesoporous TiO<sub>2</sub> Thin Films with Large Pore and Highly Crystalline Frameworks for Efficient Photoelectrochemical Conversion

*Dan Feng<sup>a</sup>, Wei Luo<sup>a</sup>, Junyong Zhang<sup>a</sup>, Ming Xu<sup>a</sup>, Renyuan Zhang<sup>a</sup>, Haoyu Wu<sup>a</sup>, Yingying Lv<sup>a</sup>,  
Abdullah M. Asiri<sup>b</sup>, Sher Bahader Khan<sup>b</sup>, Mohammed M. Rahman<sup>b</sup>, Gengfeng Zheng<sup>a\*</sup>, and  
Dongyuan Zhao<sup>a\*</sup>*

<sup>a</sup> Department of Chemistry, Shanghai Key Laboratory of Molecular Catalysis and Innovative Materials, Laboratory of Advanced Materials, Fudan University, Shanghai 200433, P. R. China.

<sup>b</sup> Chemistry Department and The Center of Excellence for Advanced Materials Research, King Abdul-Aziz University, P.O. Box 80203, Jeddah 21589, Saudi Arabia.

Email: [dyzhao@fudan.edu.cn](mailto:dyzhao@fudan.edu.cn); [gfzheng@fudan.edu.cn](mailto:gfzheng@fudan.edu.cn); Tel: +86-21-5163-0205, Fax:

+86-21-5163-0307

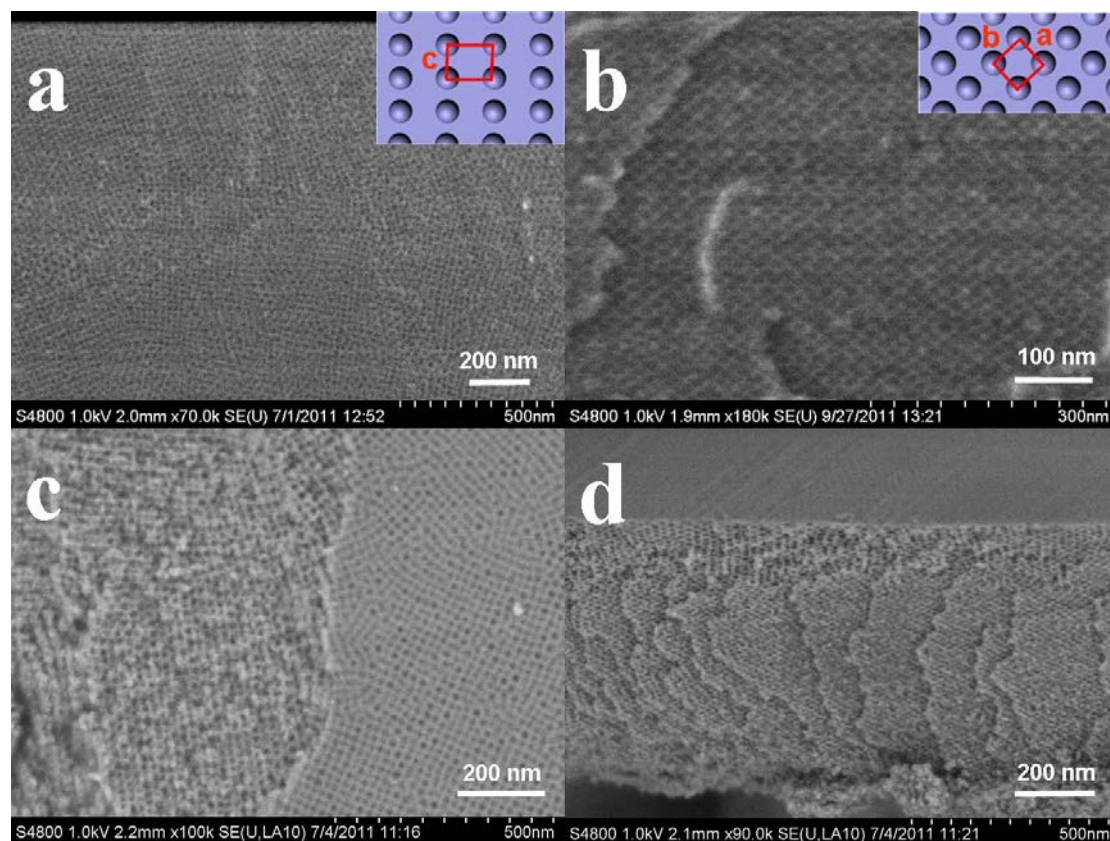

**Fig. S1** SEM images of (a, b) as-deposited mesostructured  $\text{TiO}_2$ /surfactant composite films aged at 100 °C and (c, d) mesoporous  $\text{TiO}_2$  films after pyrolysis in nitrogen at 500 °C. Images (a) and (c) showing top surfaces and edge parts of the films, while (b) and (d) showing the cross-section images of the films.

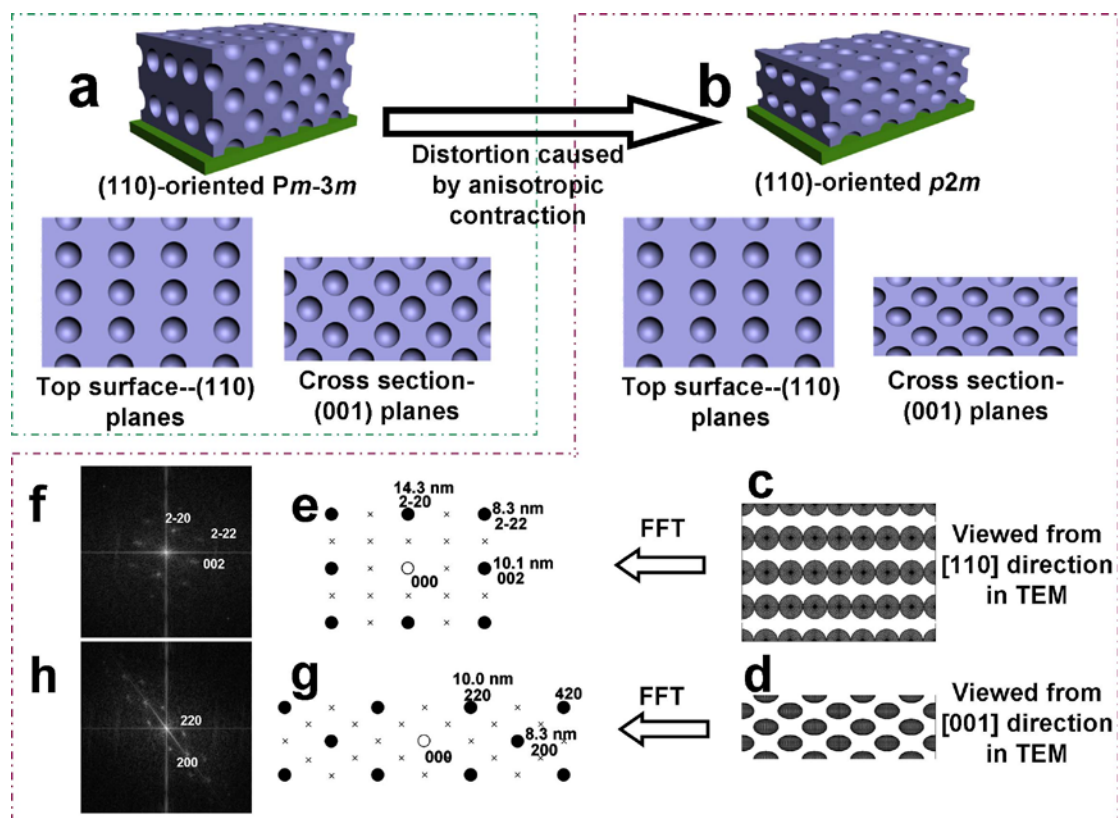

**Fig. S2** Schematic representation of the structural conversion of the mesoporous  $\text{TiO}_2$  films from (a) a (110)-oriented primitive cubic  $Pm\bar{3}m$  structure to (b) a monoclinic  $p2m$  structure during the pyrolysis. (a, b) are simulated models of the morphologies of films on substrates, top surfaces and cross-sections corresponding to the SEM images; (c, d) are simulated perspective figures of the pyrolyzed film corresponding to the TEM images viewed from [110] and [001] directions, respectively; (e – h) are indexed FFT patterns and schematic representations according to the TEM images in Figure 1e and 1f.

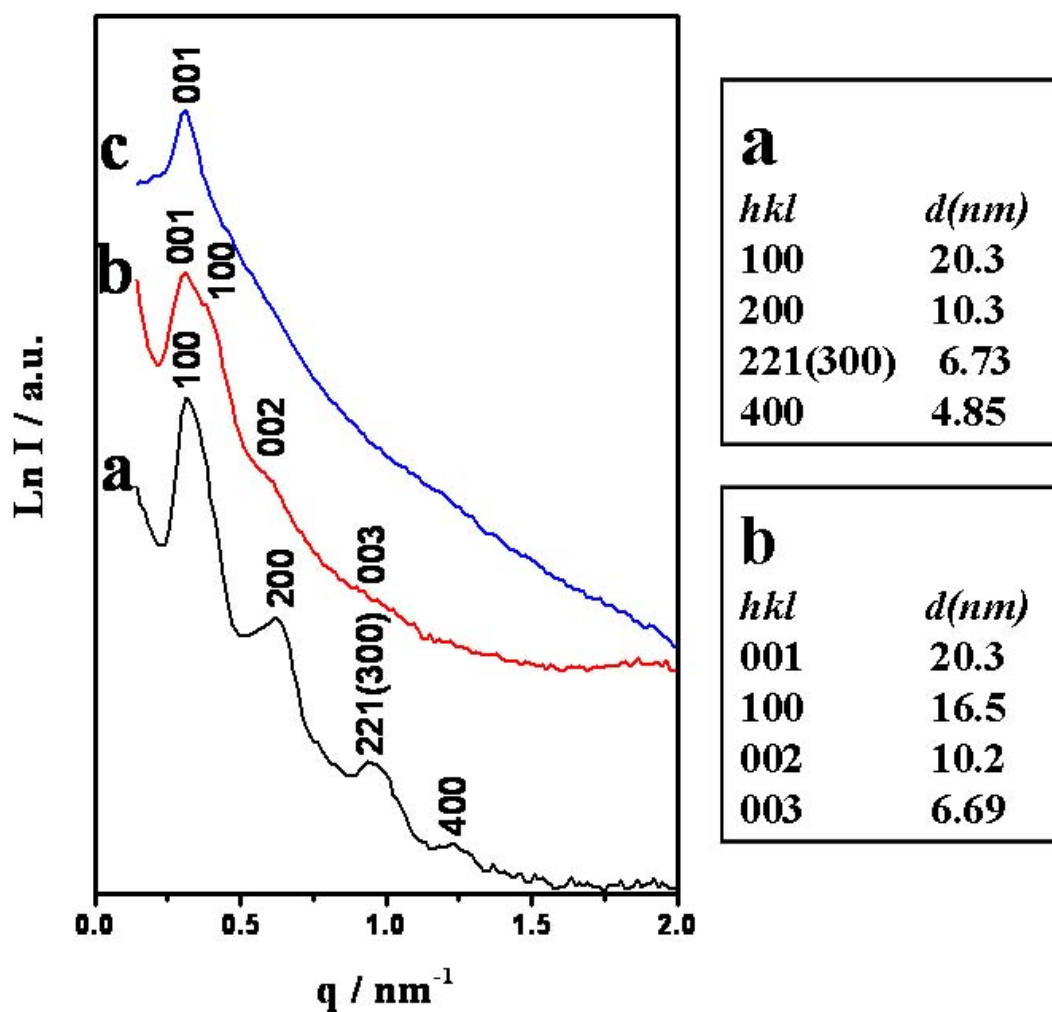

*Fig. S3* SAXS patterns of (a) as-deposited TiO<sub>2</sub>/surfactant composite films aged at 100 °C, (b) the mesoporous TiO<sub>2</sub> films after pyrolysis in nitrogen at 500 °C, and (c) mesoporous pure TiO<sub>2</sub> films after pyrolysis in air at 450 °C.

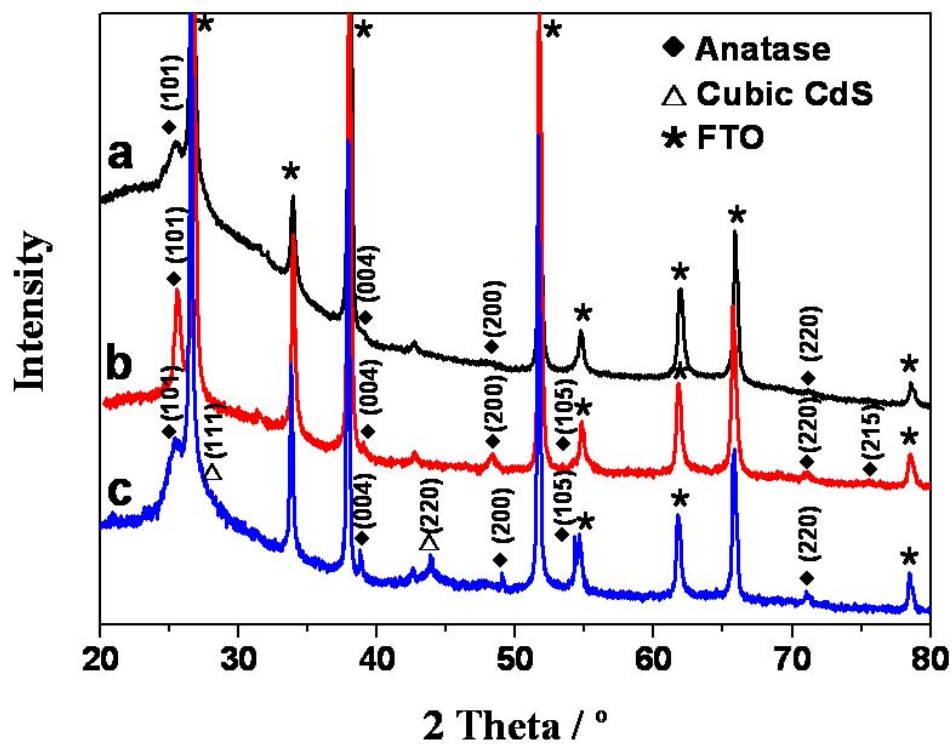

*Fig. S4* Wide-angle XRD patterns of the highly ordered mesoporous TiO<sub>2</sub> films (a) after pyrolysis in nitrogen at 500 °C, (b) after pyrolysis in air at 450 °C, and (c) after doped with CdS QDs-sensitization.

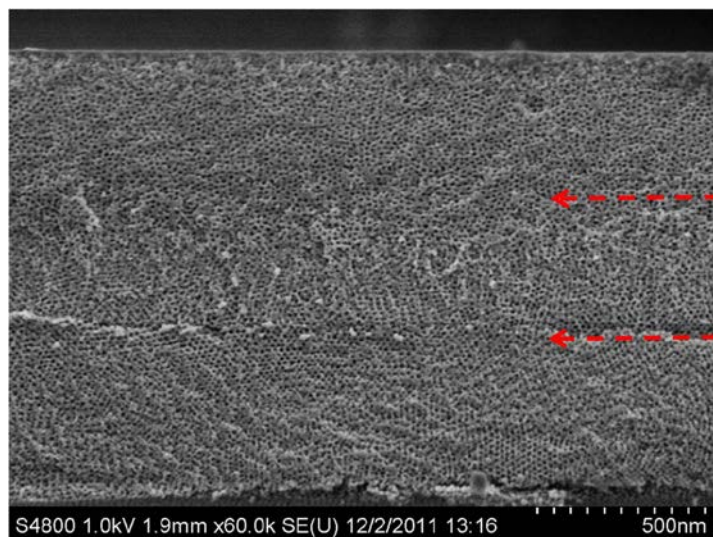

**Fig. S5** The cross-section SEM image of the 3-layered mesoporous TiO<sub>2</sub>-3L films (with thickness of 1700 nm) by coating 3 times.



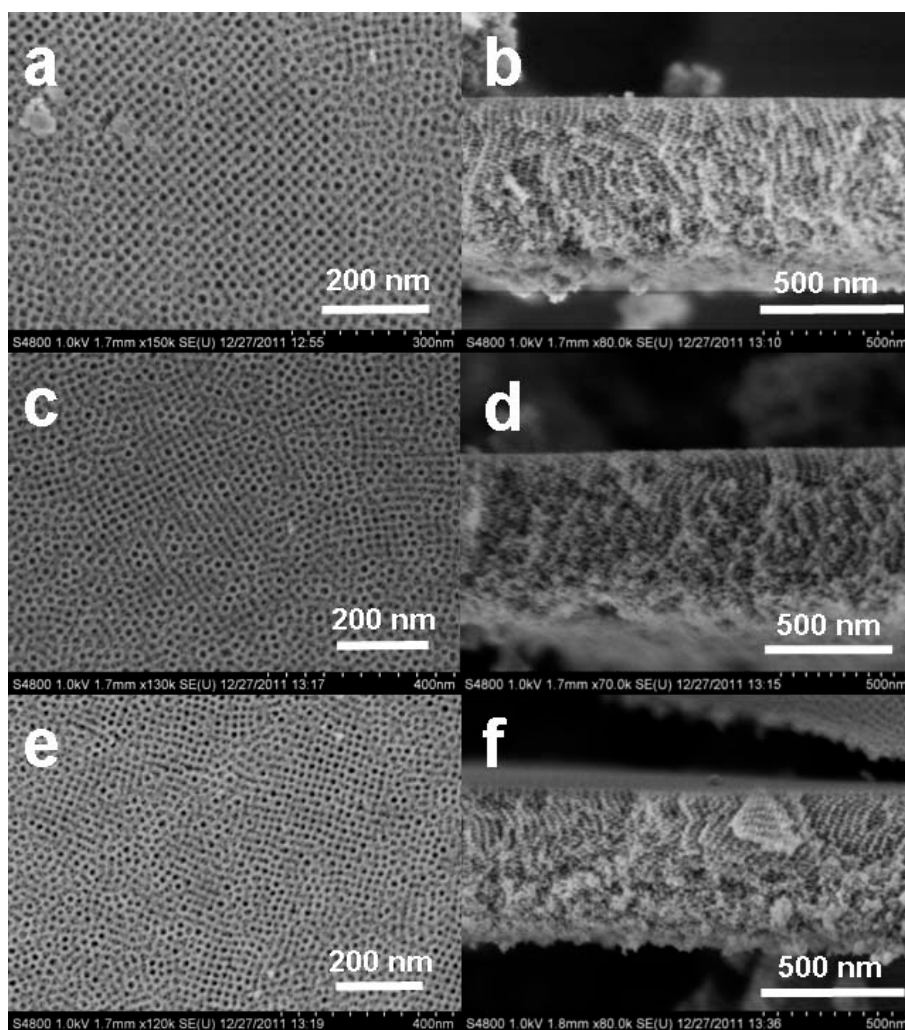

**Fig. S7** SEM images of (a, b) Cr-doped, (c, d) Ni-doped, and (e, f) Co-doped mesoporous TiO<sub>2</sub> films after being pyrolyzed at 500 °C in nitrogen and in air at 450 °C. The metal/Ti atomic ratio is ~ 2.0 %.



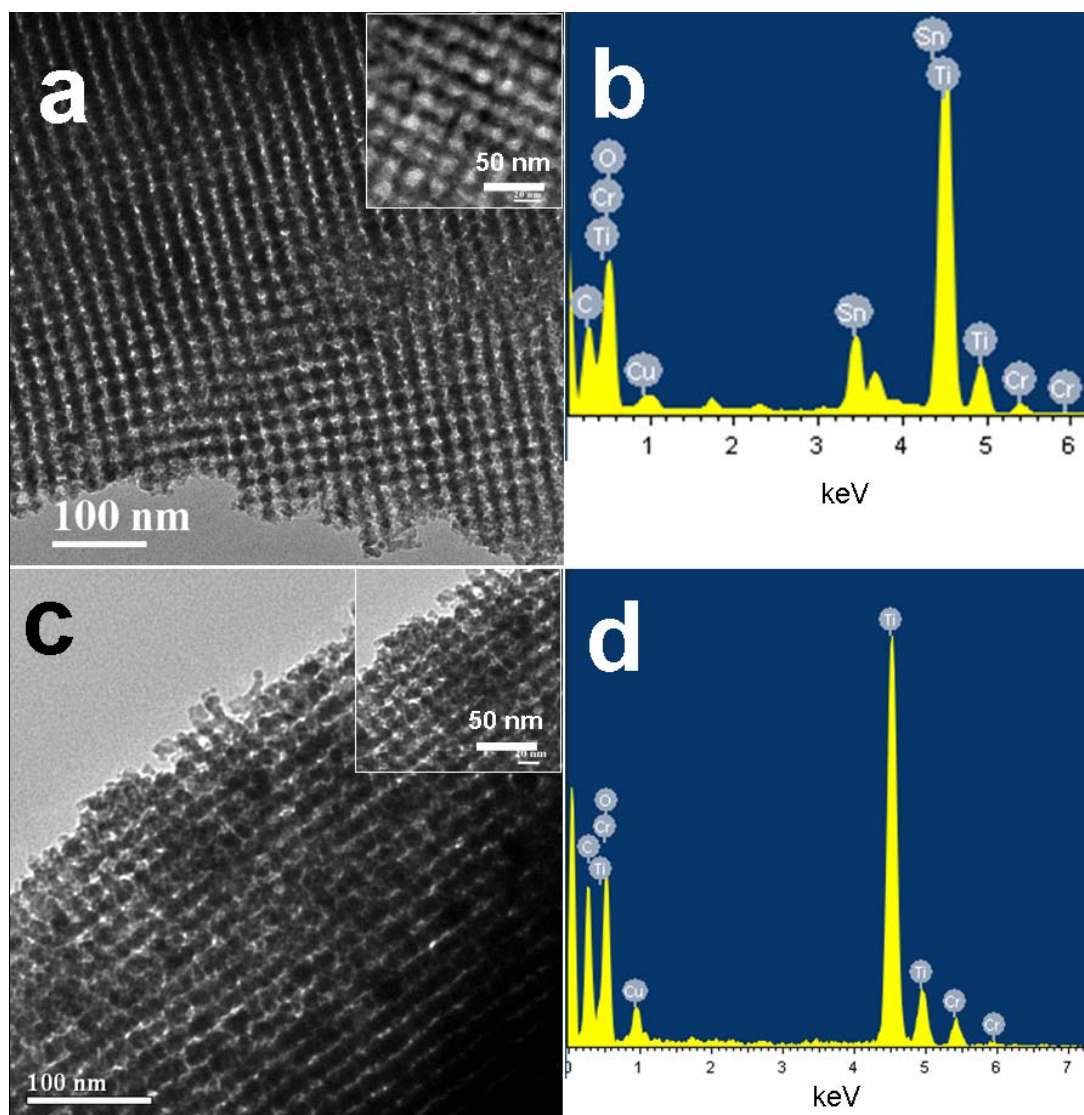

**Fig. S8** TEM images and EDX patterns of the Cr-doped mesoporous TiO<sub>2</sub> films with Cr/Ti atomic ratio of ~ 2.0 % (a, b) and ~ 6.0 % (c, d).

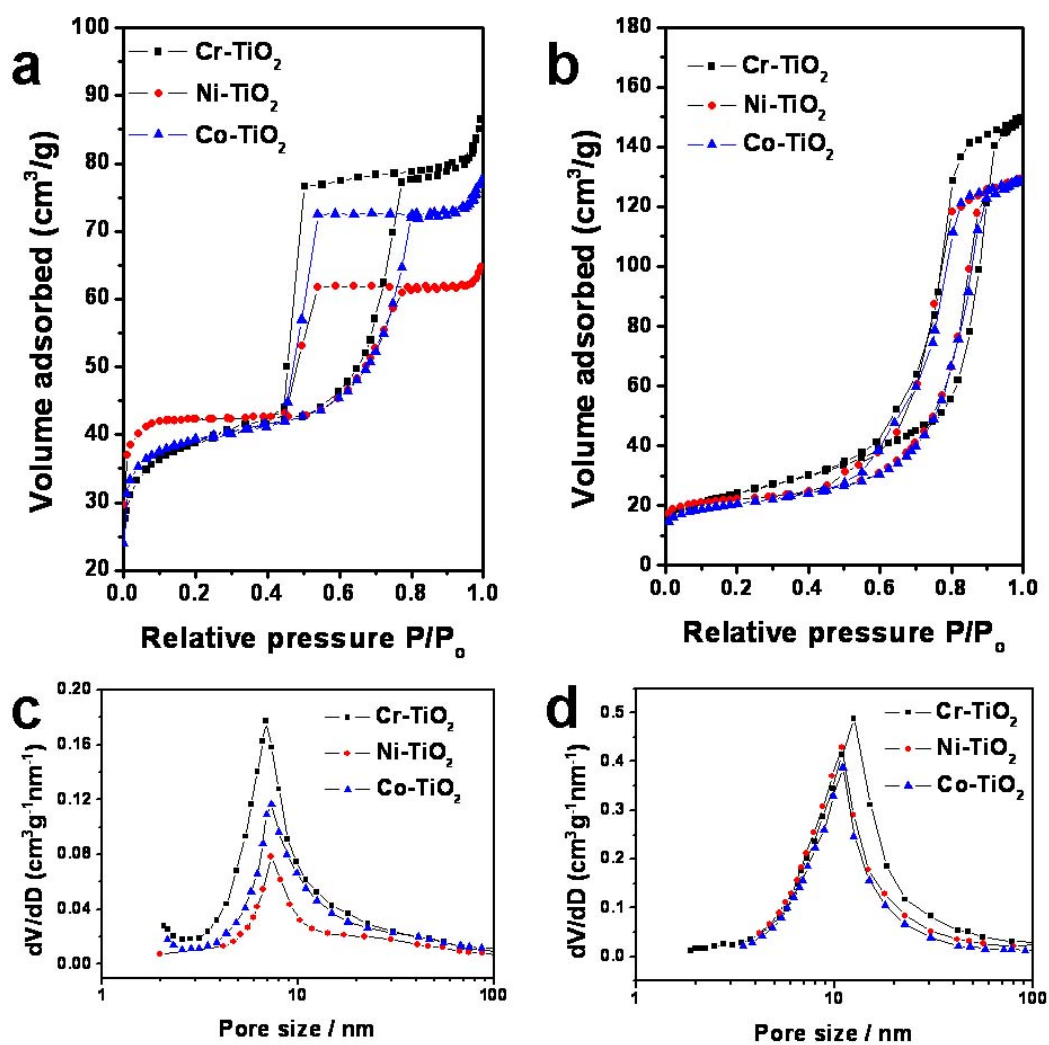

*Fig. S9* (a, b) Nitrogen sorption isotherms and (c, d) pore size distributions of Cr-doped, Ni-doped, and Co-doped mesoporous TiO<sub>2</sub> films with a metal/Ti atomic ratio of 2.0 % after pyrolysis at 500 °C in nitrogen and in air at 450 °C.

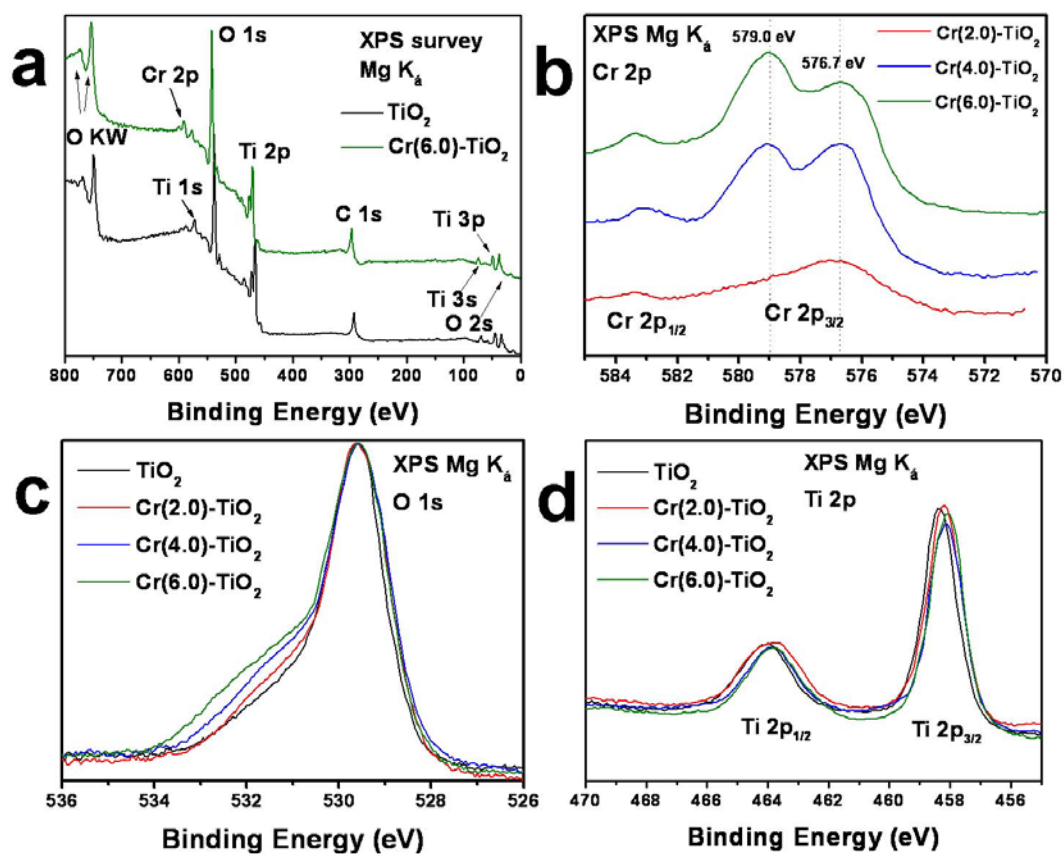

**Fig. S10** (a) XPS survey spectra, (b) Cr 2p XPS spectra, (c) normalized O 1s XPS spectra and (d) Ti 2p XPS spectra of the mesoporous TiO $_2$  films and Cr-doped mesoporous TiO $_2$  films including Cr(2.0)-TiO $_2$ , Cr(4.0)-TiO $_2$  and Cr(6.0)-TiO $_2$  films with a Cr /Ti atomic ratio of 2.0, 4.0 and 6.0 %, respectively.

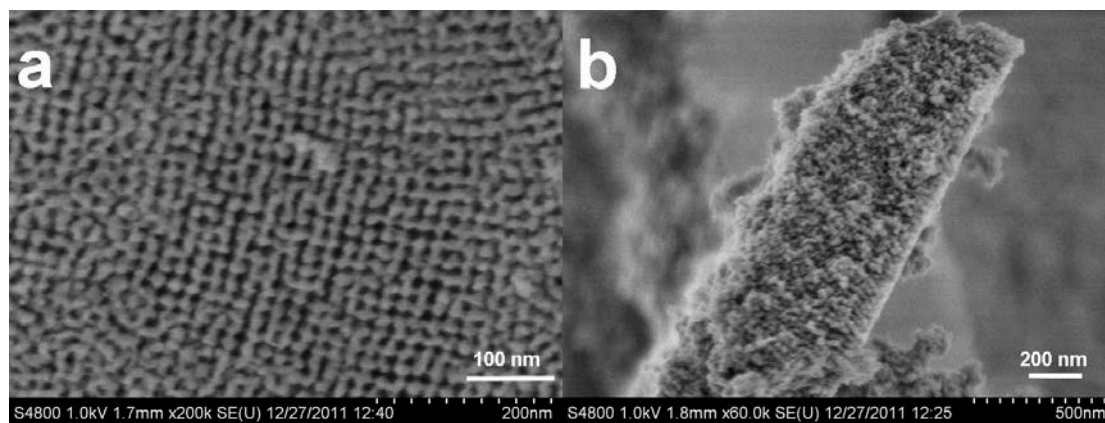

**Fig. S11** SEM images of (a) top surface and (b) cross section view of the Cr-doped mesoporous TiO<sub>2</sub> films with a Cr/Ti atomic ratio of ~ 6.0 % after pyrolysis at 500 °C in nitrogen and in air at 450 °C.

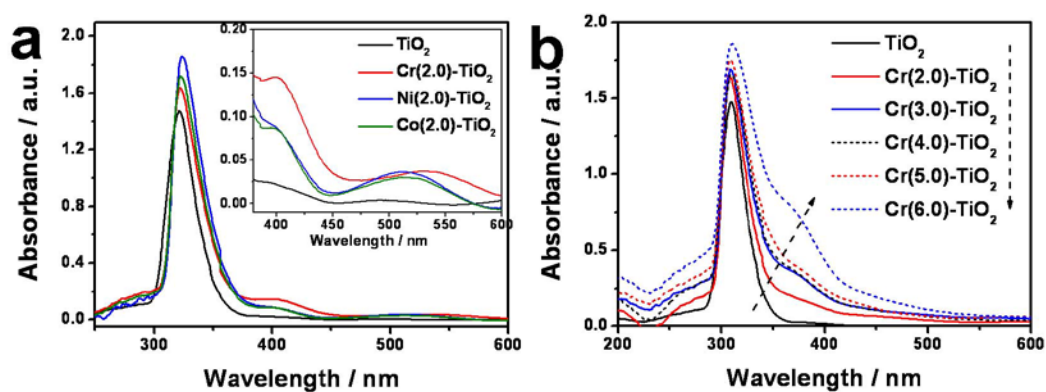

**Fig. S12** UV-vis absorption spectra of (a) different metal ions doped mesoporous TiO<sub>2</sub> film with a metal/Ti atomic ratio of ~ 2.0 % and (b) Cr-doped mesoporous TiO<sub>2</sub> films with different Cr /Ti atomic ratios of 0, 2.0, 3.0, 4.0, 5.0 and 6.0 %, respectively. Inset (a) is magnified part of the adsorption spectra in the range of 375 to 600 nm.

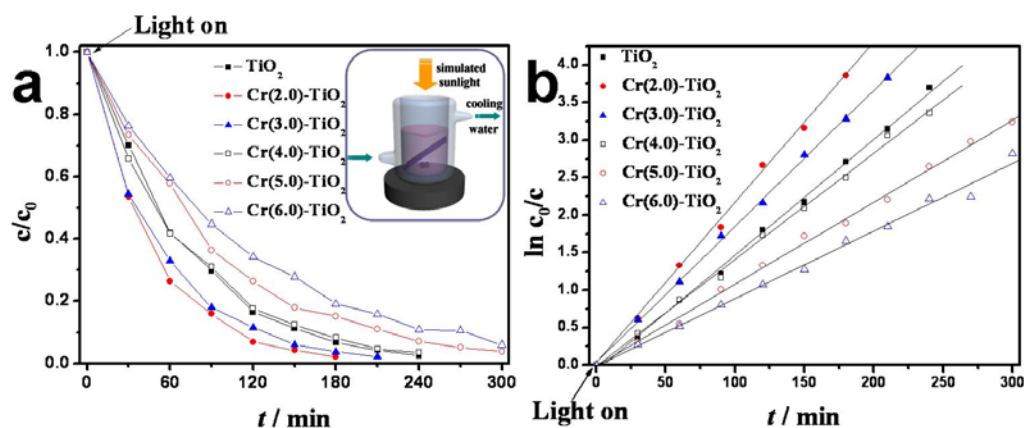

**Fig. S13** Photocatalytic degradation of rhodamine B (RhB) using film based devices by placing mesoporous  $\text{TiO}_2$  films and Cr-doped mesoporous  $\text{TiO}_2$  films including  $\text{Cr}(2.0)\text{-TiO}_2$ ,  $\text{Cr}(4.0)\text{-TiO}_2$  and  $\text{Cr}(6.0)\text{-TiO}_2$  films with a Cr /Ti atomic ratio of 2.0, 4.0 and 6.0 %, respectively. (a) Dye concentration change versus irradiation time and (b)  $\ln c_0/c$  versus irradiation time (dots) and the linear fits (lines). Inset in (a) is the schematic illustration of experimental. The photocatalytic performance of the Cr-doped mesoporous  $\text{TiO}_2$  film was evaluated by the photocatalytic degradation of RhB under simulated sunlight illuminated by a 300 W Xe lamp and at ambient condition. The film samples with substrates (film area of  $2 \times 2 \text{ cm}^2$ ) were directly placed into a quartz vessel containing 12 mL RhB aqueous solution ( $1 \times 10^{-5} \text{ mol/L}$ ). Before illumination, the reaction system was placed in dark for 30 min to ensure the adsorption balance of RhB molecules by the mesoporous films. The variation of concentration was monitored by the *in situ* UV-vis quantitative analysis at the maximum adsorption wavelength of RhB (552 nm). Cooling water was used to avoid water evaporation.

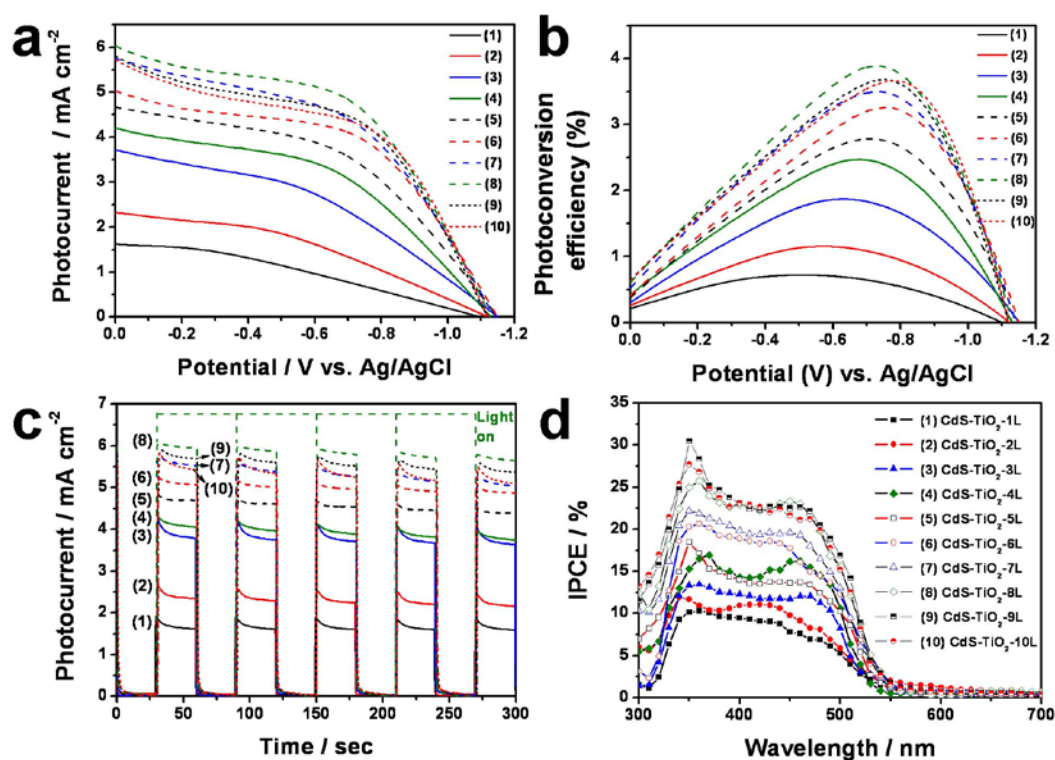

**Fig. S14** (a) Photocurrent *versus* voltage characteristics, (b) calculated photoconversion efficiencies, (c) current *versus* time measurements and (d) IPCE spectra of the CdS-sensitized mesoporous TiO<sub>2</sub> films including (1) CdS-TiO<sub>2</sub>-1L, (2) CdS-TiO<sub>2</sub>-2L, (3) CdS-TiO<sub>2</sub>-3L, (4) CdS-TiO<sub>2</sub>-4L, (5) CdS-TiO<sub>2</sub>-5L, (6) CdS-TiO<sub>2</sub>-6L, (7) CdS-TiO<sub>2</sub>-7L, (8) CdS-TiO<sub>2</sub>-8L, (9) CdS-TiO<sub>2</sub>-9L and (10) CdS-TiO<sub>2</sub>-10L with 1–10 layers, respectively.

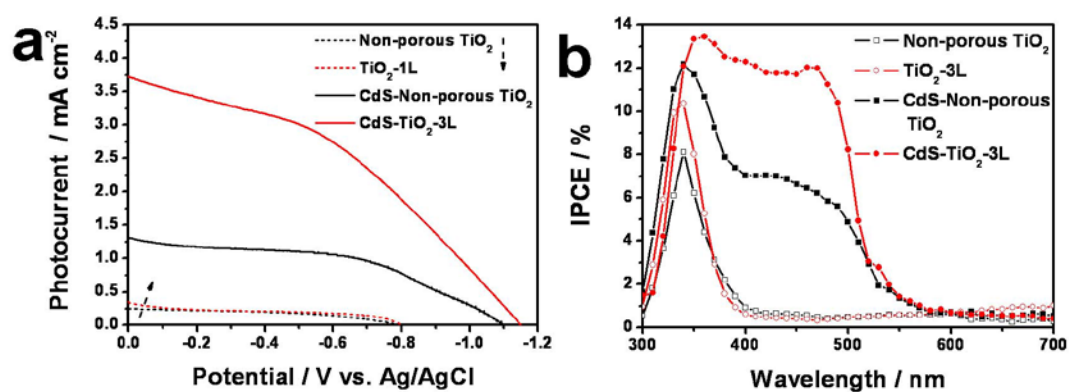

**Fig. S15** (a) Photocurrent *versus* voltage characteristics and (b) IPCE spectra of the control non-porous TiO<sub>2</sub> film sample (with the thickness of ~ 1850 nm), the 3-layered mesoporous TiO<sub>2</sub> film (TiO<sub>2</sub>-3L, thickness of ~ 1700 nm), the CdS-sensitized non-porous TiO<sub>2</sub> film (thickness of 1850 nm) and the CdS-sensitized mesoporous TiO<sub>2</sub> film (CdS-TiO<sub>2</sub>-3L, thickness of 1700 nm).



**Table S1.** PEC performance parameters of the highly-ordered mesoporous TiO<sub>2</sub> films with different thicknesses and corresponding CdS-sensitized mesoporous TiO<sub>2</sub> films.<sup>a</sup>

| Sample                              | Thickness / nm | $J_{sc}$ / mA/cm <sup>2</sup> | $V_{oc}$ / V | $\eta$ / % |
|-------------------------------------|----------------|-------------------------------|--------------|------------|
| TiO <sub>2</sub> -1L                | 500            | 0.14                          | -0.77        | 0.04       |
| TiO <sub>2</sub> -2L                | 1100           | 0.23                          | -0.78        | 0.17       |
| TiO <sub>2</sub> -3L                | 1700           | 0.35                          | -0.80        | 0.18       |
| Non-porous TiO <sub>2</sub> -3L     | 1850           | 0.25                          | -0.80        | 0.17       |
| CdS-TiO <sub>2</sub> -1L            | 500            | 1.62                          | -1.10        | 0.72       |
| CdS-TiO <sub>2</sub> -2L            | 1100           | 2.33                          | -1.12        | 1.53       |
| CdS-TiO <sub>2</sub> -3L            | 1700           | 3.72                          | -1.15        | 1.87       |
| CdS-Non-porous TiO <sub>2</sub> -3L | 1850           | 1.31                          | -1.10        | 0.80       |
| CdS-TiO <sub>2</sub> -4L            | 2250           | 4.21                          | -1.13        | 2.47       |
| CdS-TiO <sub>2</sub> -5L            | 2900           | 4.67                          | -1.15        | 2.79       |
| CdS-TiO <sub>2</sub> -6L            | 3500           | 5.03                          | -1.15        | 3.26       |
| CdS-TiO <sub>2</sub> -7L            | 4050           | 5.75                          | -1.14        | 3.50       |
| CdS-TiO <sub>2</sub> -8L            | 4750           | 6.03                          | -1.13        | 3.89       |
| CdS-TiO <sub>2</sub> -9L            | 5350           | 5.81                          | -1.12        | 3.68       |
| CdS-TiO <sub>2</sub> -10L           | 5800           | 5.72                          | -1.12        | 3.67       |

<sup>a</sup> The denotation: “TiO<sub>2</sub>-xL” represents the mesoporous TiO<sub>2</sub> film with *x* layers obtained by coating *x* times and the corresponding CdS-sensitized film names “CdS-TiO<sub>2</sub>-xL”. The thickness of the resultant mesoporous TiO<sub>2</sub> films was measured by Surface Profiler. The short circuit currents ( $J_{sc}$ ) were measured at 0 V (vs. Ag/AgCl). The open-circuit photovoltages ( $V_{oc}$ ) are values *versus* Ag/AgCl electrode. Photoconversion efficiencies ( $\eta$ ) refer the optimal conversion efficiencies calculated based on the *I-V* measurements.

**Table S2.** Porosities of the mesoporous TiO<sub>2</sub> and metal-doped mesoporous TiO<sub>2</sub> films.<sup>a</sup>

| Sample                              | <i>D</i> / nm | <i>D<sub>w</sub></i> / nm | <i>V<sub>t</sub></i> / cm <sup>3</sup> g <sup>-1</sup> | <i>S<sub>BET</sub></i> / m <sup>2</sup> g <sup>-1</sup> |
|-------------------------------------|---------------|---------------------------|--------------------------------------------------------|---------------------------------------------------------|
| TiO <sub>2</sub> -500N              | 8.0           | 4.0                       | 0.18                                                   | 161                                                     |
| Cr(2.0)-TiO <sub>2</sub> -500N      | 6.9           | 3.8                       | 0.13                                                   | 136                                                     |
| Ni(2.0)-TiO <sub>2</sub> -500N      | 7.2           | 4.0                       | 0.10                                                   | 152                                                     |
| Co(2.0)-TiO <sub>2</sub> -500N      | 7.3           | 3.9                       | 0.12                                                   | 137                                                     |
| TiO <sub>2</sub> -500N-450A         | 13.0          | 7.5                       | 0.25                                                   | 102                                                     |
| Cr(2.0)-TiO <sub>2</sub> -500N-450A | 12.5          | 7.6                       | 0.25                                                   | 85                                                      |
| Ni(2.0)-TiO <sub>2</sub> -500N-450A | 10.9          | 7.7                       | 0.21                                                   | 77                                                      |
| Co(2.0)-TiO <sub>2</sub> -500N-450A | 11.0          | 7.7                       | 0.21                                                   | 72                                                      |

<sup>a</sup> The “500N” and “450A” in sample names refer to the pyrolysis conditions at 500 °C in nitrogen and at 450 °C in air, respectively. Pore diameter calculated by the Barrett-Joyner-Halenda (BJH) method using adsorption branches. Window size calculated by the Barrett-Joyner-Halenda (BJH) method using desorption branches. Total pore volume calculated as the amount of nitrogen adsorbed at a relative pressure of 0.995.
